# Supplementary material
Source: HighWire-hosted journal article supplement (https://cmaj.ca/content/suppl/2002/04/02/164.12.1669)
Supplement: pg1669-f.pdf [file pg1669-f.pdf]

# Soins de santé préventifs, mise à jour 2001 : Le dépistage et le traitement de la dysplasie congénitale de la hanche chez les nouveau-nés

Hema Patel, conjointement avec le Groupe d'étude canadien sur les soins de santé préventifs

## Résumé

**Objectif :** Revoir l'efficacité des examens cliniques sériés et du dépistage échographique de la dysplasie congénitale de la hanche (DCH) chez les nouveau-nés et formuler des recommandations à cet effet. Cet article passe également en revue l'efficacité du dépistage chez les nouveau-nés à haut risque à l'aide de radiographies de la hanche et du bassin et de son traitement par maintien de l'abduction.

**Options :** Dépistage : Examens cliniques sériés, dépistage échographique, radiographies. Traitement : orthèses pour le maintien de l'abduction.

**Résultat :** Taux d'interventions chirurgicales, d'utilisation d'orthèses pour le maintien de l'abduction, de retard dans le diagnostic de la DCH (au-delà de 3-6 mois), de complications du traitement et de diagnostics erronés. Les résultats fonctionnels à long terme ont été jugés importants.

**Preuve :** On a interrogé le réseau MEDLINE pour relever les articles pertinents de langue anglaise publiés entre 1966 et novembre 2000 à partir de mots clés «screening» (dépistage), «hip» (hanche), «dislocation» (luxation), «dysplasia» (dysplasie), «congenital» (congénital) et «ultrasound» (échographie). On a pu retracer des études comparatives et descriptives et des articles de synthèse importants et leurs bibliographies ont été étudiées pour y repérer d'autres études.

**Bénéfices, préjudices et coûts :** Étant donné que la plupart des nourrissons connaîtront une résolution spontanée de leur DCH si elle est non tératogénique, l'identification et l'intervention précoce leur accolent à tort une étiquette superflue puisqu'ils sont perçus comme ayant un problème et leur font subir un traitement inutile. Le dépistage échographique est une mesure hautement sensible, mais peu spécifique d'une DCH significative au plan clinique. La pose d'orthèses pour le maintien de l'abduction est associée à divers problèmes et son efficacité dans le traitement de la DCH n'a pas été clairement établie. Au moins 20 % des nourrissons qui requièrent une intervention chirurgicale se sont fait poser des orthèses. Les préjudices associés à l'étiquetage, aux examens répétés et à la pose d'orthèses superflues, de même que l'utilisation des ressources nécessaires au dépistage sont substantiels.

**Valeurs :** La validité des preuves fournies a été évaluée à l'aide de méthodes élaborées par le Groupe d'étude canadien sur les soins de santé préventifs.

**Recommandations :** On dispose de preuves raisonnables justifiant l'inclusion de l'examen clinique sérié des hanches par un médecin dûment formé durant l'examen de santé périodique de tous les nourrissons jusqu'à ce qu'ils marchent seuls (niveau de preuve II-I et III, recommandation de catégorie B).

- On dispose de preuves raisonnables pour exclure le recours au dépistage échographique systématique de la DCH de l'examen de santé périodique chez les nourrissons (niveau de preuve II-I et III; recommandation de catégorie D).
- On dispose de preuves raisonnables pour exclure le dépistage sélectif de la DCH de l'examen de santé périodique chez les nourrissons à risque élevé (niveau de preuve II-I et III; recommandation de catégorie D).

## Recherche

## Research

Le Dr Patel est membre du Service des soins ambulatoires intensifs de l'Hôpital de Montréal pour enfants et du Centre de santé de l'Université McGill à Montréal au Québec.

\* La liste des membres du groupe est publiée à la fin de l'article.

Cet article a été révisé par des pairs.

Traduction d'un article paru dans le JAMC  
JAMC 2001;164(12):1669-77

- On dispose de preuves raisonnables pour exclure l'examen radiologique d'emblée pour le dépistage de la DCH de l'examen de santé périodique chez les nourrissons à haut risque (niveau de preuve III; recommandation de catégorie D).
- On dispose de preuves insuffisantes pour évaluer l'efficacité du traitement de maintien de l'abduction (niveau de preuve III; recommandation de catégorie C), mais on dispose de bonnes preuves pour appuyer une période d'observation étroite des nouveau-nés chez qui on a décelé cliniquement une DCH (niveau de preuve I; recommandation de catégorie A). Par contre, les preuves sont insuffisantes pour déterminer quelle est la durée d'observation optimale (niveau de preuve III; recommandation de catégorie C).

**Validation :** Les conclusions de cette analyse ont été passées en revue par les membres du Groupe d'étude canadien sur les soins de santé préventifs au moyen d'un processus itératif. Le Groupe d'étude a fait parvenir l'ébauche et les recommandations finales à des examinateurs indépendants sélectionnés et leurs commentaires ont été intégrés à la version finale du manuscrit.

**Commanditaire :** Le Groupe d'étude canadien sur les soins de santé préventifs est subventionné par l'entremise d'un partenariat établi entre les ministères de la Santé des provinces et des territoires et Santé Canada.

Le terme dysplasie congénitale de la hanche (DCH) fait référence à une gamme d'anomalies anatomiques de l'articulation de la hanche qui résultent d'un écart par rapport au développement normal de la hanche survenant durant les périodes de croissance embryonnaire, fœtale et infantile (Tableau 1)<sup>1-5</sup>. Bien que chez la

plupart des nourrissons atteints le problème rentre spontanément dans l'ordre au cours des quelques premiers mois de vie, la DCH persistante peut entraîner des douleurs chroniques, des anomalies de la démarche et une maladie articulaire dégénérative<sup>5-16</sup>. En 1994, le Groupe d'étude canadien sur l'examen médical périodique (désormais le Groupe d'étude canadien sur les soins de santé préventifs) recommandait une série d'examens cliniques pour le dépistage de la DCH dans le cadre des soins à prodiguer aux bébés, mais n'avait formulé aucune recommandation quant au dépistage échographique ou quant au dépistage des nourrissons à haut risque<sup>17</sup>. Depuis la publication de cet article, un grand essai contrôlé a été publié sur l'efficacité du dépistage échographique de la DCH<sup>6</sup>, 27 rapports descriptifs et 9 articles énonçant des opinions d'experts ont contribué à clarifier certaines des questions soulevées. Le présent article évalue l'efficacité du dépistage et du traitement de la DCH chez des nouveau-nés exposés à un risque élevé ou non de DCH. Les paramètres dignes de mention sont les taux d'invalidité fonctionnelle et d'interventions chirurgicales, les taux de diagnostics faussement négatifs et faussement positifs de même que les avantages et préjudices liés au traitement de maintien de l'abduction.

## Le fardeau de la souffrance

La plupart des pays industrialisés font état d'une variation de l'incidence de 1,5 à 20 cas de DCH par 1000 naissances, étant en partie due aux différences touchant les méthodes diagnostiques et le moment de l'évaluation<sup>18</sup>. La morbidité à long terme associée à la DCH n'a pas encore été précisée, mais les complications observées dans des séries de cas incluent les jambes de longueur inégale, des anomalies de la démarche, de la douleur chronique et de l'arthrose<sup>24</sup>. Certains adultes peuvent tout aussi bien présenter une invalidité

**Tableau 1 : Définitions des affections associées à la dysplasie congénitale de la hanche (DCH)<sup>2</sup>**

| Terme                 | Définition                                                                                                                                                                                                                                                                                                                                                                                                                                                                                                                                                                                                                            |
|-----------------------|---------------------------------------------------------------------------------------------------------------------------------------------------------------------------------------------------------------------------------------------------------------------------------------------------------------------------------------------------------------------------------------------------------------------------------------------------------------------------------------------------------------------------------------------------------------------------------------------------------------------------------------|
| Luxation de la hanche | Hanche dont les os articulés (c.-à-d. la tête fémorale et l'acétabulum) sont déplacés, ce qui entraîne une séparation des surfaces articulaires <sup>4</sup> . Il existe deux types de dislocation : typique et tératogénique <sup>3,4</sup> . Une dislocation typique survient chez des nourrissons neurologiquement normaux. La dislocation tératogénique est moins fréquente et est associée à des anomalies neuromusculaires comme l'arthrogrypose et le myéloméningocèle <sup>4</sup> . Les hanches luxées sont dues à une dysplasie congénitale et rentrent dans l'ordre chez les nourrissons avant leur troisième mois de vie. |
| Hanche dislocable     | Hanche qui peut être ramenée en position normale avec une flexion externe et abduction ou à l'inverse, qui peut être mise en évidence par une abduction à partir de la position normale.                                                                                                                                                                                                                                                                                                                                                                                                                                              |
| Hanche subluxée       | Hanche dislocable ayant un contact partiel entre la tête fémorale et l'acétabulum <sup>4</sup> .                                                                                                                                                                                                                                                                                                                                                                                                                                                                                                                                      |
| Hanche subluxable     | Hanche qui est habituellement bien positionnée au repos, mais qui peut devenir partiellement articulée lors de manœuvres externes.                                                                                                                                                                                                                                                                                                                                                                                                                                                                                                    |
| Dysplasie seule       | Anomalie anatomique et (ou) anomalie de croissance des surfaces articulaires en développement diagnostiquée à la radiographie; peut apparaître sous la forme d'un acétabulum en creux ou de forme irrégulière, ou bien sous la forme d'une anomalie du fémur proximal <sup>2-5</sup> .                                                                                                                                                                                                                                                                                                                                                |

minime, voire nulle; ceux qui présentent des luxations bilatérales ou un « faux acétabulum » bien développé peuvent avoir un bon niveau de fonctionnement<sup>2,19</sup>.

La subluxation prolongée de la hanche peut prédisposer à une maladie articulaire dégénérative à l'âge adulte, mais le lien entre la dysplasie acétabulaire (sans instabilité clinique) et l'arthrose n'a pas été clairement établi<sup>2</sup>. La mesure de la morbidité réelle à long terme est compliquée par la variabilité de la gravité de la DCH, le délai entre la naissance et l'apparition des symptômes à la fin de la vie adulte et l'utilisation relativement récente du dépistage échographique. À l'exception des taux d'interventions chirurgicales et de poses d'orthèses pour le maintien de l'abduction, les données sont insuffisantes en ce qui concerne toutes les autres mesures de morbidité et les conséquences au plan fonctionnel ont rarement fait l'objet de rapports. On ne dispose pas de critères standardisés en ce qui a trait aux interventions chirurgicales. La définition de ce qu'est une intervention chirurgicale diffère aussi d'un centre à l'autre. Il y a longtemps que l'on attend des études prospectives sur la morbidité à long terme de la DCH.

## Facteurs de risque

Plus de 60 % des nourrissons atteints de DCH ne présentent aucun facteur de risque identifiable<sup>16</sup>. Les nourrissons présentant les caractéristiques suivantes ont été jugés à haut risque à l'égard de la DCH, bien que ces facteurs de risque n'aient pas été validés: un parent du premier degré atteint de DCH, une présentation par le siège ou des signes cliniques d'instabilité articulaire<sup>1,6,16,21-23</sup>. Également, les bébés filles seraient plus prédisposés à la DCH que les bébés garçons<sup>6,15,24-27</sup>. Parmi les facteurs de risque généralement moins reconnus, mentionnons un « clic » persistant à l'examen clinique, un défaut postural congénital ou une déformation du pied et un retard de croissance intra-utérin<sup>6,21,23</sup>. Certaines populations ethniques et certaines régions du monde ont également été associées à un risque plus élevé de DCH (p. ex., Canadiens d'origine aborigène<sup>19</sup>).

## Méthodes

On a procédé à une interrogation du Réseau MEDLINE pour y recenser les articles publiés entre 1966 et novembre 2000 à partir des mots clés suivants : « screening » (dépistage), « hip » (hanche), « dislocation » (luxation), « dysplasia » (dysplasie), « congenital » (congénital) et « ultrasound » (échographie). La recherche se limitait aux articles de langue anglaise concernant les nourrissons ou les enfants. Toutes les études comparatives et descriptives portant sur des méthodes de dépistage ont été sélectionnées. La revue des listes bibliographiques a permis de chercher manuellement d'autres études. Des ouvrages d'orthopédie pédiatrique et leurs listes de références ont également été étudiés. Les éditoriaux renfermant l'opinion d'experts sur le sujet ont été passés en revue, mais non les résumés ni les lettres à l'éditeur.

Les paramètres mesurés associées au dépistage qui ont été retenus comprenaient les taux d'interventions chirurgicales, la pose d'orthèses pour le maintien de l'abduction, le retard du diagnostic de

DCH (au-delà de 3-6 mois), les complications de la pose d'orthèses (p. ex., nécrose avasculaire de la tête fémorale) et les faux diagnostics. L'issue fonctionnelle à long terme a été jugée importante. On a noté *a priori* que le diagnostic (incident) et les taux de poses d'orthèses étaient codépendants, c'est-à-dire qu'ils étaient fortement influencés par l'âge du nourrisson au moment de l'évaluation. Les taux d'interventions ont également été sujets à une certaine variabilité parce qu'il n'y a pas de standardisation claire des directives pour la rédaction des rapports. Les preuves ont été passées en revue de façon systématique à l'aide de la méthodologie du Groupe d'étude canadien sur les soins de santé préventifs<sup>28</sup>. En bref, l'auteur principal a évalué la qualité des preuves à l'aide du classement méthodologique (Annexe 1) et a distribué une ébauche préliminaire du manuscrit aux membres du groupe de travail. Le Groupe de travail s'est réuni en octobre 1998 puis en janvier 1999, date à laquelle les recommandations finales ont été adoptées à l'unanimité par un comité d'experts incluant l'auteur principal. Les commentaires de deux experts indépendants ont été intégrés à l'ébauche finale du manuscrit avant sa soumission pour publication. Des procédures visant à obtenir une documentation adéquate, cohérente, complète, objective et fidèle à la méthodologie du Groupe de travail ont été appliquées à toutes les étapes du processus d'examen et de rédaction en vue de produire après consensus le manuscrit final.

## Résultats

La plupart des preuves quant à l'efficacité des techniques de dépistage spécifiques ont pris la forme d'opinions d'experts et de résultats d'enquêtes sur les programmes de dépistage (Tableau 2).

### Dépistage

#### Examens cliniques sérieux

L'examen clinique répété de façon sérieuse inclut les tests d'Ortolani et de Barlow auxquels on procède au cours des quelques premiers mois de vie, et des tests visant à identifier une restriction du mouvement d'abduction de la hanche ou

**Tableau 2 : Études incluses dans l'examen systématique de l'efficacité du dépistage et du traitement de la DCH chez les nouveau-nés, selon la manœuvre**

| Manœuvre                                | Modèle (et n <sup>bre</sup> d'études)                                                                                                                                                                                |
|-----------------------------------------|----------------------------------------------------------------------------------------------------------------------------------------------------------------------------------------------------------------------|
| Examen clinique                         | Étude descriptive (12) <sup>19,23,25-27,29-35</sup><br>Editorial (1) <sup>14</sup>                                                                                                                                   |
| Examen radiographique                   | Étude descriptive (1) <sup>21</sup><br>Étude de fiabilité (1) <sup>36</sup>                                                                                                                                          |
| Dépistage échographique                 | Essai contrôlé (1) <sup>6</sup><br>Étude avant-après (1) <sup>37</sup><br>Analyse décisionnelle (1) <sup>38</sup><br>Étude descriptive (13) <sup>8,9,13,15,22,24,39-45</sup><br>Autre* (17) <sup>5,10,12,46-59</sup> |
| Orthèse pour le maintien de l'abduction | Essai randomisé contrôlé (1) <sup>11</sup><br>Étude descriptive (6) <sup>27,33,42,60-62</sup>                                                                                                                        |
| Autre                                   | Examen général (6) <sup>1-4,16,20</sup>                                                                                                                                                                              |

\* Inclut des éditoriaux et des rapports des caractéristiques de rendement des échographies et de leur rapport coût-efficacité.

des jambes de longueur inégale chez les bébés plus âgés et les enfants. Le test d'Ortolani suppose la flexion et l'abduction des hanches. Ce mouvement replace la hanche disloquée dans sa position acétabulaire normale et s'accompagne d'un «clunk» perceptible<sup>2,4</sup>. Le test de Barlow est un test de provocation de la dislocation de la hanche. Les hanches sont testées individuellement, les deux en position fléchie. La hanche testée est soumise à une abduction avec pression délicate exercée sur le haut du fémur en direction postéro-latérale. Les éléments clés de l'examen clinique sériel sont des jambes de longueur inégale (signe de Galeazzi), la restriction du mouvement d'abduction normal de la hanche et l'asymétrie des cuisses postérieures ou des plis fessiers<sup>2,4</sup>.

Pour le diagnostic de la luxation de la hanche, le test de Barlow a été associé à une valeur prédictive négative élevée (0,99) et à une valeur prédictive positive faible (0,22)<sup>39</sup>. Lorsque les tests d'Ortolani et de Barlow sont combinés, ils présentent un degré de spécificité élevée (0,98–0,99) pour le diagnostic de dislocation ou de subluxation de la hanche<sup>25,29,39,40</sup>. La sensibilité varie selon l'habileté de l'examineur et le nombre d'examens effectués<sup>30–32</sup>. Dans le cas d'examineurs d'expérience, la sensibilité se situe entre 0,87 et 0,99<sup>25,29,39</sup>. Les tests d'Ortolani et de Barlow deviennent moins sensibles chez les nourrissons plus âgés surtout en raison de leur taille et de leur masse musculaire plus imposantes et en raison de contractures de la hanche qui ont pu se développer<sup>1,3,63,64</sup>.

L'examen clinique sériel par un examinateur dûment formé semble une stratégie de dépistage efficace. À l'époque du dépistage préclinique, l'incidence de la dislocation ou de la subluxation variait de un à deux cas par 1000 nourrissons<sup>7,23,26,29,31</sup>. Le taux d'interventions chirurgicales était également de un à deux cas 1000 nourrissons<sup>8,29,65</sup>, ce qui amène à penser que la plupart des nourrissons atteints de DCH étaient probablement identifiés trop tard pour qu'une intervention non chirurgicale soit efficace. Dans les populations soumises à un dépistage clinique, le taux de dépistage d'une instabilité de l'articulation de la hanche à la naissance variait de 5 à 20 cas par 1000 enfants, principalement en fonction de l'âge au moment du test et du degré d'expérience de l'examineur<sup>16,21,23,25–27,33,34,39</sup>. En parallèle, le taux de poses d'orthèses pour le maintien de l'abduction a augmenté<sup>16,21,23,25–27,29,31,39</sup>. Plusieurs chercheurs ont émis l'hypothèse que cette augmentation post-dépistage du taux de poses d'orthèses reflète un trop grand nombre de faux diagnostics parce que les taux de DCH excédaient nettement les taux de dépistage précliniques<sup>5,10</sup>.

Avec l'examen clinique sériel, le taux d'intervention pour DCH a diminué de plus de 50 %, passant à 0,2–0,7 par 1000<sup>8,26,30,33,34,39</sup>. Ce déclin encourageant doit être mis en parallèle avec l'augmentation de résultats faussement positifs (nourrissons ayant subi des traitements superflus, habituellement par pose d'orthèses pour le maintien de l'abduction) et de résultats faussement négatifs (nourrissons présentant des résultats normaux à l'examen clinique et présentant ultérieurement d'autres signes cliniques).

## Dépistage échographique

L'échographie est une méthode non invasive de visualisation de l'articulation cartilagineuse de la hanche. Le diagnostic a été défini par des tests morphologiques (statiques) et par l'évaluation dynamique de la stabilité de la tête fémorale dans l'acétabulum. Les critères morphologiques standardisés de Graf sont largement utilisés<sup>46</sup>. Aucun critère standard n'existe pour l'évaluation dynamique de la stabilité articulaire, mais le nourrisson est en général examiné en position latérale avec la technique de Barlow<sup>6,36</sup>. Les hanches sont classifiées comme échographiquement stables (séparation minimale ou nulle) ou instables (divers degrés de séparation)<sup>6,36</sup>. L'évaluation dynamique a fait l'objet de critiques, étant jugée trop dépendante de l'examineur<sup>2</sup>. L'évaluation des caractéristiques de mesure des deux méthodes montre une fiabilité de modérée à bonne chez un même examinateur (coefficient kappa = 0,46 – 0,83) et une piètre fiabilité d'un évaluateur à l'autre (kappa = 0,09–0,30)<sup>47,48</sup>.

Les meilleures preuves quant à la valeur du dépistage échographique proviennent d'un grand essai clinique contrôlé, mené par Rosendahl et coll.<sup>6</sup>. Des nouveau-nés ( $n = 11\,925$ ) ont été assignés à l'un des trois groupes : dépistage échographique généralisé ( $n = 3\,613$ ), dépistage échographique sélectif des nouveau-nés jugés à risque élevé ( $n = 4\,388$ ) et absence de dépistage échographique ( $n = 3\,924$ ). Les patients ont été assignés à ces groupes selon la commodité. Tous les nourrissons étaient assignés au groupe sans dépistage lorsque la personne chargée de l'échographie était absente. Les nourrissons étaient assignés aux deux autres groupes de dépistage selon la localisation de la chambre de la mère après l'accouchement. Le groupe des nourrissons dits à risque élevé incluait les nourrissons présentant une luxation de la hanche, une hanche disloable, une position de siège ou des antécédents familiaux (un parent du premier degré ou deux parents du second degré atteint de DCH). Tous les nourrissons ont subi un dépistage durant les deux premières années de leur vie au moyen d'examens cliniques répétés en série (tests d'Ortolani et de Barlow). Les nourrissons du groupe ne subissant pas le dépistage échographique ont subi des examens cliniques à intervalles fréquents comparativement aux sujets des deux autres groupes pour qui les examens cliniques ont été complétés par des évaluations échographiques. Conformément aux normes de pratique du centre de recherche, tous les nourrissons à haut risque ont subi des radiographies de la hanche à l'âge de 4 à 5 mois.

Les nourrissons qui ont subi un dépistage échographique ont subi les tests morphologiques et dynamiques de la hanche (24 à 48 heures après leur naissance). Un seul spécialiste en échographie a procédé à tous les examens (fiabilité chez un même examinateur lors de 211 clichés : kappa = 0,832). Les critères de Graf modifiés ont servi à la classification des hanches. Cinq nourrissons ont été traités par orthèses pour le maintien de l'abduction si les hanches restaient disloquées ou

dislocables. Les hanches présentant une «morphologie dysplasique importante» ont également été traitées, indépendamment de la présence d'instabilité clinique. Les hanches légèrement dysplasiques n'ont été traitées que si elles étaient jugées instables à l'examen clinique ou échographique. Les hanches présentant des signes échographiques seulement d'instabilité n'ont pas été traitées. Les hanches immatures ou légèrement dysplasiques ont été suivies au moyen d'échographies et d'examen cliniques toutes les quatre semaines.

Une réduction du sextuple (risque relatif de 6) de la prévalence de DCH tardive entre le groupe soumis au dépistage clinique et le groupe soumis au dépistage échographique généralisé a été jugée cliniquement pertinente. L'étude était dotée d'une puissance statistique de l'ordre de 52 % ( $\alpha = 0,05$ ) pour démontrer une telle différence. Étant donné que l'intervention chirurgicale est rare pour la DCH, indépendamment de la stratégie de dépistage, tout programme de dépistage nécessiterait un nombre extrêmement élevé de nourrissons pour démontrer une différence statistiquement significative avec une puissance adéquate. Par exemple, pour obtenir un risque relatif de 4 avec une valeur  $\alpha$  de 0,05 et une valeur  $\beta$  de 0,20, chaque groupe devrait comprendre 12 533 nourrissons.

Le Tableau 3 montre les taux d'interventions et de DCH par 1000 nourrissons. On a noté une augmentation évidente du taux d'interventions dans le groupe soumis au dépistage échographique généralisé comparativement au groupe soumis à l'échographie sélective et à aucune échographie. À noter que le dépistage échographique généralisé a permis d'identifier 130 cas par 1 000 nourrissons normaux sur le plan clinique,

qu'il a fallu suivre mais qui n'ont pas nécessité d'orthèses pour le maintien de l'abduction. Parmi ces nourrissons, 97 % avaient présenté une résolution spontanée à l'âge de trois mois. Chaque nourrisson a subi de trois à cinq échographies avant que l'on juge qu'ils avaient des hanches normales. Les préjudices associés à l'étiquetage, aux examens répétés et à la pose inutile d'orthèses et la consommation des ressources en santé nécessaires au dépistage sont substantiels. Les résultats de cette étude s'appuient sur ceux d'études de cohortes et d'études de cas comme l'illustre le Tableau 4 qui compare les résultats du dépistage échographique à ceux de programmes de dépistage clinique. On n'a noté aucune différence clinique ou statistiquement significative quant aux taux d'interventions entre les groupes. Ni l'un ni l'autre n'a présenté de différences significatives quant au taux de DCH tardive.

L'étude de Rosendahl et ses collaborateurs<sup>6</sup> n'a pas réussi à confirmer l'avantage du dépistage échographique sélectif chez les nourrissons à haut risque. Cela peut avoir été attribuable à une absence réelle d'avantages ou au fait que la majorité des nourrissons porteurs d'une DCH ne présentent pas de facteurs de risque<sup>12,16,49</sup>. Dans leur étude, 4 388 nourrissons ont fait partie du groupe soumis à un dépistage sélectif. Parmi eux, 518 étaient jugés à risque élevé et ont subi un dépistage échographique. Aucun cas de subluxation ou de dislocation n'a été identifié. Le dépistage échographique sélectif n'a pas réduit le taux de DCH diagnostiqué tardivement (DCH tardif) ni le taux d'interventions chirurgicales comparativement au dépistage clinique seul. Ces résultats sont semblables à ceux d'enquêtes transversales précédentes<sup>32,41,49,67</sup>.

**Tableau 3 : Résultats d'un essai contrôlé<sup>6</sup> mesurant l'effet du dépistage échographique de la DCH sur les taux de traitement et la prévalence des cas de DCH diagnostiqués tardivement**

| Variable                                                    | Groupe étudié; taux par 1000 nourrissons              |                                                                                           |                                                  |
|-------------------------------------------------------------|-------------------------------------------------------|-------------------------------------------------------------------------------------------|--------------------------------------------------|
|                                                             | Dépistage échographique généralisé<br><i>n</i> = 3613 | Dépistage échographique sélectif (nourrissons à haut risque seulement)<br><i>n</i> = 4388 | Aucun dépistage échographique<br><i>n</i> = 3924 |
| Anomalie à l'examen clinique*                               | 24                                                    | 18                                                                                        | 18                                               |
| Anomalie à l'échographie seulement                          | 9                                                     | 3                                                                                         | –                                                |
| Traitement de maintien de l'abduction†                      | 34¶                                                   | 20                                                                                        | 18                                               |
| Aucun traitement, mais cas suivi‡                           | 130                                                   | 18                                                                                        | –                                                |
| Subluxation ou dislocation tardive§                         | 0,3                                                   | 0,7                                                                                       | 1,3                                              |
| DCH tardive§ ne nécessitant pas d'intervention chirurgicale | 1,4                                                   | 1,9                                                                                       | 2,1                                              |
| DCH tardive§ nécessitant une intervention chirurgicale      | 0,0                                                   | 0,2                                                                                       | 0,5                                              |
| Tout DCH tardif§                                            | 1,4                                                   | 2,1                                                                                       | 2,6                                              |

\*Des résultats anormaux au test de Barlow à la naissance, avec ou sans anomalies (morphologique ou dynamique) à l'échographie.

†Taux de complication non rapportés.

‡Le suivi est basé sur un examen échographique sériel toutes les quatre semaines. Chez 97 % des cas, le problème est rentré spontanément dans l'ordre dès l'âge de trois mois; les 3 % des cas restants ont été jugés normaux sur le plan clinique et des orthèses pour le maintien de l'abduction ont été utilisées à l'âge de trois mois. Au moins 97 % des nourrissons avaient reçu un diagnostic erroné et étaient jugés porteurs d'une anomalie cliniquement pertinente alors qu'en fait aucune intervention n'était nécessaire.

§Tous les diagnostics «tardifs» ont été faits après un mois de vie (2,5–18 mois).

¶Le taux plus élevé de traitement par orthèses dans ce groupe est le reflet d'une forte proportion de nourrissons ayant reçu un diagnostic erroné de problème cliniquement pertinent et des traitements superflus.

## Le dépistage radiographique

En ce qui concerne le dépistage radiographique, des clichés antéro-postérieurs des deux hanches sont effectués entre le troisième et le cinquième mois de vie chez des enfants à haut risque par ailleurs asymptomatiques<sup>6,21</sup>. Cette stratégie de dépistage est problématique en raison du manque de consensus sur la définition d'une DCH cliniquement pertinente à la radiographie<sup>2</sup>, bien que les caractéristiques suivantes soient utilisées : indice acétabulaire élevé, interruption de la ligne de Shenton, élargissement du plancher pelvien, aspect retardé du noyau fémoral ossifié et diminution de la couverture de la tête fémorale<sup>1,2,20,36</sup>. La fiabilité inter- et intra-examineur est faible<sup>36</sup> et la sensibilité et la spécificité n'ont pas fait l'objet de rapports adéquats. Bien que la radiographie soit une technique non invasive, l'exposition des nourrissons aux radiations (estimée à 22 mGy) mérite réflexion, particulièrement lorsque les radiographies sont répétées.

## Traitement

### Observation suivie d'une résolution spontanée

L'histoire naturelle de la DCH indique que les anomalies présentes à la naissance subissent l'influence dynamique de la croissance constante du fémur et du cartilage acétabulaire<sup>2,3,12</sup>. Les forts taux de résolutions sans intervention (90 à 97 %) ont fait l'objet de rapports dans de nombreuses études d'observation<sup>6,9,15,18</sup>.

### Traitement de maintien de l'abduction

L'abduction, à l'aide de couches doubles ou triples, de divers types de coussins ou d'orthèses, portées pendant plusieurs semaines ou plusieurs mois, a habituellement été recommandée «dès que possible» chez les nouveau-nés présentant une DCH, mais en général à l'aide de l'attelle de Pavlik<sup>4</sup>. En l'absence de données adéquates, l'efficacité réelle

du traitement de maintien de l'abduction risque d'être surestimée. Les études d'observation ont signalé que de 20 à 30 % des nourrissons ( $n = 20-468$ ) ayant subi un traitement de maintien de l'abduction précoce ont éventuellement nécessité une intervention chirurgicale<sup>26,27,33,34,42</sup>.

L'orthèse pour le maintien de l'abduction est associée à divers problèmes. La nécrose avasculaire de la tête fémorale a été observée chez 1 à 4 % de tous les nourrissons traités<sup>27,39,42</sup> (jusqu'à 73 % dans un centre)<sup>60</sup> et le risque d'une telle complication est plus élevé chez les nourrissons plus jeunes dont les plaques de croissance peuvent être plus vulnérables à l'atteinte vasculaire<sup>25,39,42</sup>. On a également signalé des cas d'ulcères de pression, d'épiphysite, de paralysie du nerf fémoral, de dislocation inférieure de la hanche et d'instabilité médiane de l'articulation du genou<sup>2,3,12,14,39,42,61</sup>. La morbidité associée au faux diagnostic est réelle, mais n'a pas été quantifiée.

Le moment du diagnostic mérite qu'on s'y attarde puisque chez la majorité des nourrissons atteints de DCH, cet état rentrera spontanément dans l'ordre en quelques semaines sans qu'ils ne subissent de préjudices consécutifs à une intervention superflue. Un essai randomisé contrôlé regroupant des nourrissons présentant des hanches dislocables n'a révélé aucune différence à l'examen clinique ou échographique à 6 et à 12 mois entre les 41 nourrissons qui ont subi la pose immédiate d'orthèses et les 38 qui ont été observés pendant deux semaines avant de subir, si nécessaire, une pose d'orthèses<sup>11</sup>. Dans une étude de cohorte, les taux d'intervention chirurgicale n'étaient pas différents selon que les enfants aient été traités à l'âge de cinq mois (diagnostic «tardif») ou qu'ils aient porté des orthèses dès la naissance<sup>39</sup>.

## Sommaire

Le Tableau 5 montre le nombre de nourrissons chez qui il faut procéder à un dépistage échographique si l'on veut prévenir un cas de DCH<sup>6,68</sup>. Pour chaque nourrisson porteur d'une subluxation ou d'une dislocation et qui nécessite une intervention, 1003 nourrissons devraient subir un

**Tableau 4 : Comparaison des résultats de l'examen clinique et du dépistage échographique pour DCH**

| Comparaison                                   | Méthode de dépistage: taux par 1000 nourrissons |                                                                                              |
|-----------------------------------------------|-------------------------------------------------|----------------------------------------------------------------------------------------------|
|                                               | Examen clinique                                 | Dépistage échographique                                                                      |
| DCH à la naissance                            | 5-20 <sup>6,16,21,23,26,29,31,39</sup>          | Morphologie : 17-159 <sup>6,9,15,41,66</sup><br>Stabilité dynamique : 24-60 <sup>15,66</sup> |
| DCH à 1 mois                                  | 0,3-5,0 <sup>6,16,29,31</sup>                   | Dépistage sélectif : 2,1 <sup>6,8,41</sup><br>Dépistage généralisé : 1,4 <sup>6,37</sup>     |
| DCH à 3 mois                                  | —                                               | 9 <sup>9</sup>                                                                               |
| Orthèses pour le maintien de l'abduction      | 5-20 <sup>6,21,26,27,30,32,33,37</sup>          | Dépistage sélectif : 4-18 <sup>6,8,41</sup><br>Dépistage généralisé : 34-44 <sup>6,37</sup>  |
| DCH tardive (diverses définitions utilisées)  | 0,2-1,1 <sup>2,25,26,30-32,39,67</sup>          | 0,2-1,3 <sup>6,8,37,41</sup>                                                                 |
| DCH nécessitant une intervention chirurgicale | 0,2-0,7 <sup>6,8,26,30,33,39</sup>              | 0,0-0,4 <sup>6,8,15</sup>                                                                    |

dépistage échographique. Parmi ces nourrissons, au moins 126 seraient diagnostiqués à tort et suivis en tant que possiblement porteurs de DCH. La limite supérieure de l'intervalle de confiance de 95 % (-4105) indique qu'un cas réel de subluxation ou de dislocation nécessitant une intervention serait manqué pour chaque groupe de 4105 nourrissons subissant un dépistage.

Il est intéressant de comparer les taux de persistance de l'instabilité de la hanche à trois époques : à l'époque du dépistage préclinique, 1 ou 2 nourrissons par 1000 se sont révélés porteurs d'une DCH tardive, habituellement à l'âge de 6-18 mois et presque tous ces nourrissons ont dû subir une intervention<sup>7,8,24,26,29,31</sup>. L'avènement du dépistage clinique a ramené le taux d'interventions à 0,2-0,7 par 1000, mais a ainsi fait augmenter le taux de poses d'orthèses à 5-20 par 1000. C'est-à-dire que pour réduire le taux d'interventions chirurgicales de 0,3-1,8 par 1000, 3-19 nourrissons par 1000 ont probablement reçu un diagnostic erroné et subi un traitement superflu. La réduction du taux d'interventions lors du dépistage échographique généralisé comparé au dépistage préclinique est de 0,6-1,8 par 1000. Encore une fois, en atteignant cette réduction, de 32 à 43 nourrissons par 1000 sont traités inutilement et un nombre beaucoup plus grand de nourrissons reçoivent un faux diagnostic, mais ne sont pas traités.

Il semble que le dépistage échographique fondé sur des critères morphologiques ou dynamiques mené auprès de populations générales ou jugées à haut risque, identifierait erronément la DCH chez beaucoup plus de nourrissons que l'examen clinique sériel. Les diminutions minimales des taux de DCH tardive ou d'interventions chirurgicales ne justifient pas le fardeau associé au traitement ou au diagnostic. Au centre de cette problématique entourant le dépistage est l'absence d'une définition de la dysplasie de la hanche en vertu de critères morphologiques ou fonctionnels. On ne dispose pas de critères de distinction clairs entre les nourrissons qui ont des hanches normales, immatures ou dysplasiques<sup>5,50</sup>.

Le dépistage échographique semble être une mesure très sensible, mais peu spécifique pour détecter une DCH pertinente au plan clinique. En raison de la faible prévalence de la DCH au sein de la population, la valeur prédictive posi-

tive du dépistage échographique est faible et la valeur prédictive négative est élevée. Tant que l'on ne disposera pas d'une définition explicite de ce qu'est une dysplasie importante de la hanche, la spécificité du dépistage échographique restera faible.

En terminant, il faut porter une attention spéciale au moment où sont appliquées les manœuvres de dépistage de la DCH par rapport à l'histoire naturelle de la maladie. Idéalement, le dépistage devrait se faire à un âge où il est peu probable que la DCH rentre spontanément dans l'ordre, mais avant que le traitement de maintien de l'abduction ne devienne inefficace.

## Recommandations

### *du Groupe d'étude canadien sur les soins de santé préventifs*

Les recommandations quant au dépistage de la DCH chez les nourrissons sont résumées au Tableau 6.

### Dépistage généralisé

- On dispose de preuves raisonnables appuyant l'inclusion du dépistage de la DCH au moyen d'examen cliniques sériel dans le cadre de l'examen de santé périodique chez tous les nourrissons (recommandation de catégorie B). Cette manœuvre devrait être effectuée par un clinicien expérimenté au cours de la première semaine de vie, au cours du premier mois de vie, puis aux 2<sup>e</sup>, 4<sup>e</sup>, 6<sup>e</sup> et 12<sup>e</sup> mois de vie. Si une anomalie est décelée, on suggère une consultation en orthopédie pédiatrique, de même que des examens d'imagerie précis de la hanche (échographie chez les enfants de moins de 5 mois et radiographie chez les enfants plus âgés).
- On dispose de preuves raisonnables appuyant l'exclusion du dépistage échographique de la DCH de l'examen de santé périodique chez les nourrissons (recommandation de catégorie D).

*Note importante :* L'efficacité du dépistage dépend énormément de la compétence de l'examineur. Les cliniciens devraient être adéquatement formés et avoir amplement

**Tableau 5 : Nombre de nourrissons devant subir un dépistage échographique pour la prévention d'un cas de DCH**

| Population soumise au dépistage                 | Issue; nombre de dépistages requis (et IC 95 %) |                                                         |                                  |
|-------------------------------------------------|-------------------------------------------------|---------------------------------------------------------|----------------------------------|
|                                                 | Toutes DCH                                      | Subluxation ou dislocation nécessitant une intervention | DCH nécessitant une intervention |
| Générale (tous les nourrissons)                 | 859 (318 à -1212)                               | 1003 (447 à -4105)                                      | 1962 (822 à -5088)               |
| Sélective (nourrissons à haut risque seulement) | 2000 (389 à -636)                               | 1693 (513 à -1303)                                      | 3550 (895 à -1805)               |

Note : IC = intervalle de confiance. Les chiffres négatifs requis pour le dépistage doivent être interprétés comme le nombre requis pour causer un préjudice (p. ex., -1 212 signifie que pour chaque tranche de 1 212 nourrissons soumis au dépistage, l'intervention passera à côté de 1 cas de DCH).

l'occasion de revoir leurs habiletés. La disponibilité limitée des équipements échographiques appropriés et d'examineurs dûment formés limite davantage l'utilisation de cette méthode de dépistage de la DCH dans de nombreuses régions du Canada.

### Dépistage des nourrissons exposés à un risque élevé

- On dispose de preuves raisonnables pour exclure le dépistage échographique sélectif de la DCH de l'examen de santé périodique chez les enfants à risque élevé

**Table 6 : Sommaire des recommandations pour le dépistage de la DCH chez les nouveau-nés**

| Manœuvre                                                                                                                                                                                                                                  | Efficacité                                                                                                                                                                                                                                                                                                                                                                                                                                                                                                                                                                                            | Niveau de preuve*                                                             | Recommandation*                                                                                                                                                                                                                         |
|-------------------------------------------------------------------------------------------------------------------------------------------------------------------------------------------------------------------------------------------|-------------------------------------------------------------------------------------------------------------------------------------------------------------------------------------------------------------------------------------------------------------------------------------------------------------------------------------------------------------------------------------------------------------------------------------------------------------------------------------------------------------------------------------------------------------------------------------------------------|-------------------------------------------------------------------------------|-----------------------------------------------------------------------------------------------------------------------------------------------------------------------------------------------------------------------------------------|
| <b>Dépistage</b>                                                                                                                                                                                                                          |                                                                                                                                                                                                                                                                                                                                                                                                                                                                                                                                                                                                       |                                                                               |                                                                                                                                                                                                                                         |
| <i>Nourrissons sans risque particulier</i>                                                                                                                                                                                                |                                                                                                                                                                                                                                                                                                                                                                                                                                                                                                                                                                                                       |                                                                               |                                                                                                                                                                                                                                         |
| Examens cliniques répétés en série par des examinateurs dûment formés (tests d'Ortolani et de Barlow chez les nourrissons plus jeunes et surveillance des limites de l'abduction et de la longueur des jambes chez les enfants plus âgés) | Les examens cliniques sériés diminuent le taux d'interventions de 1 à 2 par 1000 nourrissons à 0,2 à 0,7 par 1000, avec une augmentation concomitante du taux de pose d'orthèses pour le maintien de l'abduction de 4 à 19 par 1000<br><br>Taux de DCH tardive ou intervention chirurgicale n'ont pas différé selon que les enfants subissaient le dépistage échographique ou l'examen clinique                                                                                                                                                                                                       | Niveau III <sup>19,23,25-27,29-35</sup><br><br>Niveau II-1 <sup>6</sup>       | Bon niveau de preuve pour inclure l'examen clinique sérié des hanches par un clinicien formé lors de l'examen de santé périodique chez tous les nourrissons jusqu'à ce qu'ils puissent marcher seuls (catégorie B)                      |
| Dépistage échographique (méthode statique ou dynamique)                                                                                                                                                                                   | Les programmes de dépistage échographiques généraux font significativement augmenter les taux d'interventions (orthèses), les examens répétés et les diagnostics faussement positifs, sans faire diminuer les taux de DCH tardive ou d'interventions chirurgicales                                                                                                                                                                                                                                                                                                                                    | Niveau II-1 <sup>6</sup> et niveau III <sup>8,9,13,15,22,24,38-45</sup>       | Bon degré de preuve pour exclure le dépistage échographique généralisé de la DCH de l'examen de santé périodique des nourrissons (catégorie D)                                                                                          |
| <i>Nourrissons à haut risque</i>                                                                                                                                                                                                          |                                                                                                                                                                                                                                                                                                                                                                                                                                                                                                                                                                                                       |                                                                               |                                                                                                                                                                                                                                         |
| Dépistage sélectif chez les nourrissons à haut risque (présentation de siège, signes cliniques d'instabilité articulaire, antécédents familiaux de DCH)                                                                                   | Comme la plupart des nourrissons atteints de DCH ne présentent pas de facteur de risque, le dépistage sélectif est inefficace à réduire les taux d'interventions                                                                                                                                                                                                                                                                                                                                                                                                                                      | Niveau II-1 <sup>6</sup> et niveau III <sup>32,41,67</sup>                    | Bon niveau de preuve pour exclure le dépistage sélectif de la DCH de l'examen de santé périodique chez les nourrissons à haut risque (catégorie D)                                                                                      |
| Examen radiologique des hanches et du bassin chez les nourrissons de 3 à 5 mois                                                                                                                                                           | La définition radiographique de la DCH ne fait pas l'unanimité et on ne peut établir de corrélation avec l'issue fonctionnelle. On a signalé une sensibilité faible et une piètre fiabilité d'un examinateur à l'autre.                                                                                                                                                                                                                                                                                                                                                                               | Niveau III <sup>2,21,36</sup>                                                 | Bon niveau de preuve pour exclure le dépistage radiographique de routine de la DCH de l'examen de santé périodique chez les nourrissons à haut risque (catégorie D)                                                                     |
| <b>Traitement</b>                                                                                                                                                                                                                         |                                                                                                                                                                                                                                                                                                                                                                                                                                                                                                                                                                                                       |                                                                               |                                                                                                                                                                                                                                         |
| Traitement de maintien de l'abduction (harnais de Pavlik ou autre dispositif)                                                                                                                                                             | L'efficacité réelle du traitement de maintien de l'abduction est inconnue. Des études ont pu être erronées en raison du taux naturellement élevé de résolution spontanée de la DCH chez les nourrissons.<br><br>Le traitement hâtif par orthèses n'est pas toujours efficace. Au moins 20 % des nourrissons qui requièrent une intervention chirurgicale ont porté des orthèses peu après leur naissance.<br><br>Les orthèses pour le maintien de l'abduction sont associées à une variété de réactions indésirables dont la nécrose avasculaire de la hanche (chez 1 à 4 % des nourrissons traités). | Niveau III <sup>27,33,34,42,62</sup><br><br>Niveau III <sup>39,42,60,61</sup> | Preuves insuffisantes pour mesurer l'efficacité du traitement de maintien de l'abduction (catégorie C)                                                                                                                                  |
| Moment de l'application du traitement de maintien de l'abduction (intervention précoce)                                                                                                                                                   | Compte tenu du fort taux de résolution spontanée de la DCH, le moment opportun d'une intervention précoce ne se situe pas immédiatement après la naissance.                                                                                                                                                                                                                                                                                                                                                                                                                                           | Niveau I <sup>11</sup> et niveau III <sup>18,39</sup>                         | Bon niveau de preuve pour appuyer une période supervisée d'observation des nouveau-nés présentant une DCH décelée cliniquement (catégorie A)<br><br>Preuves insuffisantes pour déterminer la durée optimale d'observation (catégorie C) |

\* Voir Annexe 1 pour les définitions des niveaux de preuves et des catégories de recommandations.

(recommandation de catégorie D). Tant que les facteurs de risque proposés ne seront pas validés, les médecins peuvent opter pour des examens plus fréquents des bébés filles nés en position de siège et des nourrissons qui ont des antécédents familiaux de DCH. Malgré l'absence de preuves formelles, les médecins peuvent choisir de suivre les recommandations formulées par l'*American Academy of Pediatrics* pour ces nourrissons (voir page suivante).

- On dispose de preuves raisonnables pour exclure le dépistage radiographique de routine de la DCH de l'examen de santé périodique chez les nourrissons à haut risque (recommandation de catégorie D).

## Traitement

- On dispose de preuves insuffisantes pour pouvoir évaluer l'efficacité du traitement de maintien de l'abduction (recommandation de catégorie C) et de bonnes preuves pour appuyer une période d'observation supervisée des nouveau-nés chez qui on a décelé une DCH cliniquement (recommandation de catégorie A). Par contre, on ne dispose pas de preuves suffisantes pour déterminer la durée optimale de la période d'observation (recommandation de catégorie C).
- On ne dispose d'aucune preuve appuyant l'utilisation de doubles ou de triples couches comme traitement de maintien de l'abduction chez les nourrissons présentant une DCH.

## D'autres organisations

La Société canadienne de pédiatrie n'a pas adopté de position officielle au sujet du dépistage de la DCH chez les nouveau-nés. L'*American Academy of Pediatrics* a pour sa part récemment publié des lignes directrices concernant l'évaluation de la DCH<sup>69</sup>. Elle a recommandé l'examen clinique sériel des hanches par un examinateur dûment formé comme étant la méthode actuellement la plus efficace pour le dépistage de la DCH. Le dépistage échographique généralisé n'est pas recommandé.

Chez les nourrissons à haut risque, l'*American Academy of Pediatrics* recommande que les bébés filles nés en position de siège subissent un examen d'imagerie de la hanche, soit par échographie à six semaines de vie ou par radiographie à quatre mois de vie. L'imagerie de la hanche est facultative chez les garçons nés en position de siège et chez les filles qui présentent des antécédents familiaux de DCH. L'examen clinique sériel seul est recommandé pour les garçons qui ont des antécédents familiaux positifs et pour tous les autres bébés filles asymptomatiques<sup>69</sup>.

## Programme de la recherche

Il faudra approfondir la recherche afin de mieux comprendre (a) le moment le plus opportun pour appliquer le

traitement de maintien de l'abduction et son efficacité, (b) la mesure des issues fonctionnelles à long terme, (c) la validité des facteurs de risque, (d) la portée clinique d'une dysplasie de la hanche légère à modérée asymptomatique, (e) le rôle de l'échographie dans les cas ambigus cliniquement et dans le suivi des nourrissons atteints de DCH.

Conflit d'intérêt : Aucun déclaré.

**Rédacteur :** Le Dr Patel, à titre d'auteur principal, a été chargée de tous les aspects liés à l'inspiration du projet, à l'examen des preuves, à l'ébauche soumise au Groupe de travail canadien sur les soins de santé préventifs et aux révisions demandées par le groupe de travail et les experts indépendants. Le groupe de travail avait deux rôles principaux : premièrement, tous les membres du groupe de travail ont entièrement passé en revue le document d'analyse systématique lors de plusieurs rencontres, formulant chaque fois leurs commentaires à l'auteur au sujet des preuves soumise, et ils ont discuté avec l'auteur pour en arriver à des recommandations pratiques ; deuxièmement, le bureau du groupe de travail s'est chargé du processus analytique du comité, de recruter les experts indépendants et d'aider l'auteur dans sa recherche bibliographique, dans l'élaboration des tableaux ou d'autres documents d'appoint et la révision des diverses ébauches du manuscrit.

**Remerciements :** Le Groupe de travail canadien sur les soins de santé préventifs tient à remercier le Dr William Cole du département de chirurgie de l'Hospital for Sick Children de Toronto, et le Dr Carol Dezateux du département d'épidémiologie et de santé publique de l'Institute of Child Health à Londres en Angleterre d'avoir révisé l'ébauche du présent article. Les opinions exprimées dans ce rapport sont celles de l'auteur et du groupe de travail et ne reflètent pas nécessairement celles des réviseurs.

## Références

1. Weinstein SL. Natural history of congenital hip dislocation (CHD) and hip dysplasia. *Clin Orthop* 1987;225:62-76.
2. Weinstein SL. Developmental hip dysplasia and dislocation. In: Morrissy RT, Weinstein SL, editors. *Lovell and Winter's pediatric orthopaedics*. 4th ed. Philadelphia: Lippincott-Raven; 1996. p. 903-43.
3. Tachdjian MO. Congenital dysplasia of the hip. In: Tachdjian MO, editor. *Pediatric orthopaedics*. 2nd ed. Vol 1. Philadelphia: WB Saunders; 1990. p. 297-526.
4. Mooney JF, Emans JB. Developmental dislocation of the hip: a clinical overview. *Pediatr Rev* 1995;16(8):299-303.
5. Clarke NMP. Diagnosing congenital dislocation of the hip. *BMJ* 1992;305:435-6.
6. Rosendahl K, Markestad T, Lie RT. Ultrasound screening for developmental dysplasia of the hip in the neonate: the effect on treatment rate and prevalence of late cases. *Pediatrics* 1994;94(1):47-52.
7. Barlow TG. Early diagnosis and treatment of congenital dislocation of the hip. *J Bone Joint Surg Br* 1962;44:292-301.
8. Boeree NR, Clarke NMP. Ultrasound imaging and secondary screening for congenital dislocation of the hip. *J Bone Joint Surg Br* 1994;76(4):525-33.
9. Castelein RM, Sauter AJM. Ultrasound screening for congenital dysplasia of the hip in newborns: its value. *J Pediatr Orthop* 1988;8(6):666-70.
10. Dodenhoff RM. Role of ultrasound and harness treatment in the management of developmental dysplasia of the hip. *Ann R Coll Surg Engl* 1996;79:157-8.
11. Gardiner HM, Dunn PM. Controlled trial of immediate splinting versus ultrasonographic surveillance in congenitally dislocatable hips. *Lancet* 1990;336:1553-6.
12. Hansson G, Jacobsen S. Ultrasonography screening for developmental dysplasia of the hip joint. *Acta Paediatr* 1997;86(9):913-5.
13. Holen KJ, Terjesen T, Tegnander A, Bredland T, Saether OD, Eik-Nes SH. Ultrasound screening or hip dysplasia in newborns. *J Pediatr Orthop* 1994;14(5):667-73.
14. Dwyer NS. Congenital dislocation of the hip: To screen or not to screen? *Arch Dis Child* 1987;62(6):635-7.
15. Marks DS, Clegg J, Al-Chalabi AN. Routine ultrasound screening for neonatal hip instability. Can it abolish late-presenting congenital dislocation of the hip? *J Bone Joint Surg Br* 1994;76(4):534-8.
16. Standing Medical Advisory Committee, Standing Nursing and Midwifery Advisory Committee Working Party for the Secretaries of State for Social Services and Wales. Screening for the detection of congenital dislocation of the hip. *Arch Dis Child* 1986;61(9):921-6.
17. Feldman W. Well baby care in the first 2 years of life. In: Goldbloom R, editor. *The Canadian guide to clinical preventive health care*. Vol 1. Ottawa: Canada Communications Group; 1994:258-66.
18. Bialik V, Bialik GM, Blazer S, Sujov P, Wiener F, Berant M. Developmental dysplasia of the hip: new approach to incidence. *Pediatrics* 1999;103(1):93-9.
19. Walker JM. Congenital hip disease in a Cree-Ojibwa population: a retrospective study. *CMAJ* 1977;116(5):501-4.

20. Wedge JH, Wasylenko MJ. The natural history of congenital disease of the hip. *J Bone Joint Surg Br* 1979;61(3):334-8.
21. Garvey M, Donoghue VB, Gorman WA, O'Brien N, Murphy JFA. Radiographic screening at four months of infants at risk for congenital hip dislocation. *J Bone Joint Surg Br* 1992;74(5):704-7.
22. Jones DA, Powell N. Ultrasound and neonatal hip screening. A prospective study of "high risk" babies. *J Bone Joint Surg Am* 1990;72(3):457-9.
23. Jones DA. Importance of the clicking hip in screening for congenital dislocation of the hip. *Lancet* 1989;1:599-601.
24. Sochart DH, Paton RW. Role of ultrasound assessment and harness treatment in the management of developmental dysplasia of the hip. *Ann R Coll Surg Engl* 1996;78(6):505-8.
25. Poul J, Bajeroja J, Sommernitz M, Straka M, Pokorny M, Wong FYH. Early diagnosis of congenital dislocation of the hip. *J Bone Joint Surg Br* 1992;74(5):695-9.
26. Tredwell SJ, Bell HM. Efficacy of neonatal hip examination. *J Pediatr Orthop* 1981;1(1):61-5.
27. Lennox IAC, McLauchlan J, Murali R. Failures of screening and management of congenital dislocation of the hip. *J Bone Joint Surg Br* 1993;75(1):72-5.
28. Woolf SH, Battista RN, Anderson GM, Logan AG, Wang E, Canadian Task Force on the Periodic Health Examination. Assessing the clinical effectiveness of preventive maneuvers: analytic principles and systematic methods in reviewing evidence and developing clinical practice recommendations. *J Clin Epidemiol* 1990;43(9):891-905.
29. Fulton MJ, Barer ML. Screening for congenital dislocation of the hip: an economic appraisal. *CMAJ* 1984;130(9):1149-56.
30. Dunn PM, Evans RE, Thearle MJ, Griffiths HED, Witherow PJ. Congenital dislocation of the hip: early and late diagnosis and management compared. *Arch Dis Child* 1985;60(5):407-14.
31. Lehmann ECH, Street DG. Neonatal screening in Vancouver for congenital dislocation of the hip. *CMAJ* 1981;124(8):1003-8.
32. Macnicol MF. Results of a 25-year screening programme for neonatal hip instability. *J Bone Joint Surg Br* 1990;72(6):1057-60.
33. Krikler SJ, Dwyer NSP. Comparison of results of two approaches to hip screening in infants. *J Bone Joint Surg Br* 1992;74(5):701-3.
34. Godward S, Dezateux C. Surgery for congenital dislocation of the hip in the UK as a measure of outcome of screening. *Lancet* 1998;351(9110):1149-52.
35. Place MJ, Parkin DM, Fritton JM. Effectiveness of neonatal screening for congenital dislocation of the hip. *Lancet* 1978;2(8083):249-50.
36. Broughton NS, Brougham DI, Cole WG, Menelaus MB. Reliability of radiological measurements in the assessment of the child's hip. *J Bone Joint Surg Br* 1989;71(1):6-8.
37. Tonniss D, Storch K, Ulbrich H. Results of newborn screening for CDH with and without sonography and correlation of risk factors. *J Pediatr Orthop* 1990;10(2):145-52.
38. Hernandez RJ, Cornell RG, Hensinger RN. Ultrasound diagnosis of neonatal congenital dislocation of the hip. A decision analysis assessment. *J Bone Joint Surg Br* 1994;76(4):539-43.
39. Burger BJ, Burger JD, Bos CFA, Obermann WR, Rozing PM, Vandembroucke JP. Neonatal screening and staggered early treatment for congenital dislocation or dysplasia of the hip. *Lancet* 1990;336:1549-53.
40. Anderson JE, Funnemark PO. Neonatal hip instability: screening with anterior-dynamic ultrasound method. *J Pediatr Orthop* 1995;15(3):322-4.
41. Clarke NMP, Clegg J, Al-Chalabi AN. Ultrasound screening of hips at risk for CDH. Failure to reduce the incidence of late cases. *J Bone Joint Surg Br* 1989;71(1):9-12.
42. Bradley J, Wetherill M, Benson MKD. Splintage for congenital dislocation of the hip: Is it safe and reliable? *J Bone Joint Surg Br* 1987;69(2):257-62.
43. Berman L, Klenerman L. Ultrasound screening for hip abnormalities: Preliminary findings in 1001 neonates. *BMJ* 1986;293(6549):719-22.
44. Boere-Boonekamp MM, Kerkhoff THM, Schuil PB, Zielhuis GA. Early detection of developmental dysplasia of the hip in the Netherlands: the validity of a standardized assessment protocol in infants. *Am J Public Health* 1998;88(2):285-8.
45. Poul J, Garvie D, Grahame R, Saunders AJS. Ultrasound examination of neonates' hip joints. *J Pediatr Orthop B* 1998;7(1):59-61.
46. Graf R. Fundamentals of sonographic diagnosis of infant hip dysplasia. *J Pediatr Orthop* 1984;4(6):735-40.
47. Dias JJ, Thomas IH, Lamont AC, Mody BS, Thompson JR. The reliability of ultrasonographic assessment of neonatal hips. *J Bone Joint Surg Br* 1993;75(3):479-82.
48. Jomha NM, McIvor J, Sterling G. Ultrasonography in developmental hip dysplasia. *J Pediatr Orthop* 1995;15(1):101-4.
49. Catterall A. The early diagnosis of congenital dislocation of the hip. *J Bone Joint Surg Br* 1994;76(4):515-6.
50. Donaldson JS. The use of sonography in screening for developmental dysplasia of the hip. *AJR Am J Roentgenol* 1994;162(2):399-400.
51. Harcke HT. Screening newborns for developmental dysplasia of the hip: the role of sonography. *AJR Am J Roentgenol* 1994;162(2):395-7.
52. Hernandez R, Hensinger RN. Developmental dysplasia of the hip and ultrasound: More is less? *Arch Pediatr Adolesc Med* 1995;149(6):641-2.
53. Cheng JCY, Chan YL, Hui PW, Shen WY, Metreweli C. Ultrasonographic hip morphometry in infants. *J Pediatr Orthop* 1994;14(1):24-8.
54. Gerscovich EO. A radiologist's guide to the imaging in the diagnosis and treatment of developmental dysplasia of the hip. *Skeletal Radiol* 1997;26(8):447-56.
55. Davids JR, Benson LJ, Mubarak SJ, McNeil N. Ultrasonography and developmental dysplasia of the hip: a cost-benefit analysis of three delivery systems. *J Pediatr Orthop* 1995;15(3):325-9.
56. Rosendahl K, Markestad T, Lie RT, Sudmann E, Geitung JT. Cost-effectiveness of alternative screening strategies for developmental dysplasia of the hip. *Arch Pediatr Adolesc Med* 1995;149(6):643-8.
57. Zieger M, Hilpert S, Schulz RD. Ultrasound of the infant hip. Part I: Basic principles. *Pediatr Radiol* 1986;16(6):483-7.
58. Zieger M. Ultrasound of the infant hip. Part II: Validity of the method. *Pediatr Radiol* 1986;16(6):488-92.
59. Zieger M, Schulz RD. Ultrasonography of the infant hip. Part III: Clinical application. *Pediatr Radiol* 1987;17(3):226-32.
60. Kalamchi A, MacEwen GD. Avascular necrosis following treatment of congenital dislocation of the hip. *J Bone Joint Surg Am* 1980;62(6):876-87.
61. Langkamer VG, Clarke NMP, Witherow P. Complications of splintage in congenital dislocation of the hip. *Arch Dis Child* 1991;66(11):1322-5.
62. Suzuki S. Ultrasound and the Pavlik harness in CDH. *J Bone Joint Surg Br* 1993;75(3):483-7.
63. Novacheck TF. Developmental dysplasia of the hip. *Pediatr Clin North Am* 1996;43(4):829-48.
64. Harcke HT. Developmental dysplasia of the hip: a spectrum of abnormality. *Pediatrics* 1999;103(1):152.
65. Von Rosen S. Early diagnosis and treatment of congenital dislocation of the hip joint. *Acta Orthop Scand* 1956;26:136.
66. Rosendahl K, Markestad T, Lie RT. Ultrasound in the early diagnosis of congenital dislocation of the hip: the significance of hip stability versus acetabular morphology. *Pediatr Radiol* 1992;22(6):430-3.
67. Moore FH. Examining infants' hips — Can it do harm? *J Bone Joint Surg Br* 1989;71(1):4-5.
68. Rembold CM. Number needed to screen: development of a statistic for disease screening. *BMJ* 1998;317(7154):307-12.
69. Committee on Quality Improvement, Subcommittee on Developmental Dysplasia of the Hip. Clinical practice guideline: early detection of developmental dysplasia of the hip. *Pediatrics* 2000;105(4 Pt 1):896-905.

**Les requêtes de tiré à part doivent être soumises au:** Canadian Task Force on Preventive Health Care, Parkwood Hospital, 801 Commissioners Rd. E, London ON N6C 5J1; [ctf@ctfphc.org](mailto:ctf@ctfphc.org)

**Les membres du Groupe d'étude canadien sur les soins de santé préventifs**

**Président :** Dr. John W. Feightner, Professor, Department of Family Medicine, University of Western Ontario, London, Ont.

**Président sortant :** Dr. Richard Goldbloom, Professor, Department of Pediatrics, Dalhousie University, Halifax, NS.

**Membres:** Drs. R. Wayne Elford, Professor and Chair of Research, Department of Family Medicine, University of Calgary, Calgary, Alta.; Michel Labrecque, Professor, Unité de médecine familiale, Université Laval, Rimouski, Que.; Robin McLeod, Professor, Department of Surgery, Mount Sinai Hospital and University of Toronto, Toronto, Ont.; Harriet MacMillan, Associate Professor, Departments of Psychiatry and Behavioural Neurosciences and of Pediatrics, Canadian Centre for Studies of Children at Risk, McMaster University, Hamilton, Ont.; Jean-Marie Moutquin, Professor and Director, Département d'obstétrique-gynécologie, Université de Sherbrooke, Sherbrooke, Que.; Christopher Patterson, Professor and Head, Division of Geriatric Medicine, Department of Medicine, McMaster University, Hamilton, Ont.; and Elaine E.L. Wang, Associate Professor, Departments of Pediatrics and Public Health Sciences, Faculty of Medicine, University of Toronto, Toronto, Ont.

**Personnes ressources :** Ms. Nadine Wathen, Coordinator, and Mr. Tim Pauley, Research Assistant, Canadian Task Force on Preventive Health Care, Department of Family Medicine, University of Western Ontario, London, Ont.

**Annexe 1 : Qualité des preuves et catégories de recommandations du Groupe d'étude canadien sur les soins de santé préventifs**

**Qualité des preuves**

- |      |                                                                                                                                                                             |
|------|-----------------------------------------------------------------------------------------------------------------------------------------------------------------------------|
| I    | Données obtenues dans le cadre d'au moins un essai comparatif bien conçu randomisé                                                                                          |
| II-1 | Données obtenues dans le cadre d'essais comparatifs bien conçus, sans randomisation                                                                                         |
| II-2 | Données obtenues dans le cadre d'études de cohortes ou d'études analytiques cas-témoins, réalisées de préférence dans plus d'un centre ou par plus d'un groupe de recherche |
| II-3 | Données comparatives de différents lieux et époques avec ou sans intervention; résultats spectaculaires d'études non comparatives                                           |
| III  | Opinions exprimées par des sommités dans le domaine et reposant sur l'expérience clinique; études descriptives ou rapports de comités d'experts                             |

**Catégories de recommandations**

- |   |                                                                                                                                                                                                                                    |
|---|------------------------------------------------------------------------------------------------------------------------------------------------------------------------------------------------------------------------------------|
| A | Il y a des preuves suffisantes pour recommander que le trouble ou l'intervention soit expressément pris en considération dans un examen médical périodique                                                                         |
| B | Il y a des preuves acceptables permettant de recommander que le trouble ou l'intervention soit expressément pris en considération dans un examen médical périodique                                                                |
| C | Les preuves sont insuffisantes pour qu'on puisse recommander l'inclusion ou l'exclusion d'un trouble ou d'une intervention dans un examen médical périodique, mais des recommandations peuvent être formulées pour d'autres motifs |
| D | On dispose de preuves acceptables pour recommander qu'un trouble ou une intervention soit expressément exclu d'un examen médical périodique                                                                                        |
| E | Il y a des preuves suffisantes pour qu'on puisse recommander qu'un trouble ou une intervention soit expressément exclu d'un examen médical périodique                                                                              |
